# Supplementary material for: Polyphenols from traditional Chinese medicine and Mediterranean diet are effective against Aβ toxicity in vitro and in vivo in Caenorhabditis elegans
Source: Royal Society of Chemistry journal article supplement (doi:10.1039/d1fo02147h), 2021-12-15
Supplement: d1fo02147h1.xlsx [file d1fo02147h1.xlsx]

## Sheet: Sheet1
Appendix 2: Fluorescence raw data for the in vitro amyloid aggregation assay
Polyphenols from Traditional Chinese Medicine and Mediterranean Diet are effective against Aβ toxicity in vitro and in vivo in Caenorhabditis elegans
Adriana Gea-González (B.S.) ⸸, Samanta Hernández-García (Ph.D) ⸸, Paula Henarejos-Escudero (B.S), Pedro Martinez-Rodriguez (B.S), Francisco García-Carmona (Ph.D), Fernando Gandía-Herrero (Ph.D)
Time	THT+Prot	Control DMSO	Scuttellarein 8uM	Scuttellarein 20uM	Scuttellarein 40uM	Scuttellarein 60uM	Scuttellarein 83.33uM	Baicalein 8uM	Baicalein 20uM	Baicalein 40uM	Baicalein 60uM	Baicalein 83.33uM	HT 0.033 mM	HT 0.33 mM	HT 3.33 mM	HT 33.33 mM	AHT 0.033mM	AHT 0.33mM	AHT 3.33 Mm	AHT 33.33 Mm
0	0.5	0.5	-8.5	0.5	0	0	0	0.5	0	0	0.5	0.5	0	0	0	0	0	0	0	0.5
5	-5.75	-12.75	-9.5	-0.5	-8	-3.5	-2.5	4.5	-4	-7	-4	-19	7	-7	-6.5	-9.5	-1.75	-4.75	-13	-3.5
10	-5.75	-11	-2	0.5	-11	-3.5	-4.5	7.5	-1.5	-4	-5	-21	9	-5.5	-9	-13.5	-1.5	-7	-12.5	-5.5
15	-3	-13	5.5	2	-11	-2.5	-4.5	12	-0.5	-3.5	-3	-21.5	13.5	-5.5	-9	-16.5	-1	-8	-10	-8
20	0.25	-18.25	10	3.5	-11.5	-1.5	-4	15.5	3.5	-2	-1.5	-20.5	15	-4.5	-10.5	-19.5	3.25	-3.75	-5	-11
25	-0.25	-18.5	12	2	-11.5	-1	-5	18.5	5	2.5	0	-20.5	13	-3.5	-10	-18.5	3	-1	2.5	-13.5
30	2.75	-20.75	18.5	4.5	-11.5	-0.5	-2.5	22.5	8	4	4	-20	13.5	-2.5	-9.5	-18.5	8	5	9.5	-18
35	5	-3.25	29	6	-10	0	-2	23	12.5	6	5.5	-18	10	3	-8	-18	13	14.5	16	-21.5
40	10.75	-0.25	39.5	11	-8.5	1	0	37.5	13	11	10	-16.5	14.5	3.5	-4.5	-15.5	28.75	23.75	21	-24.5
45	20.5	33.25	47.5	16	-4	3	2	46.5	22.5	17.5	11	-14.5	15.5	9	-4.5	-13.5	37.75	26.75	26	-27
50	31.5	50.25	54.5	22.5	-0.5	6.5	4.5	57	28.5	25	13.5	-13.5	19	13	0	-10	44.25	40.25	29.5	-29.5
55	47.5	66	63	29.5	6	9	6	67	36	26.5	14	-14	34.5	24.5	-0.5	-10.5	48.5	47	33	-33.5
60	64	75.25	70	36	9	8.5	6.5	75.5	41.5	32.5	16.5	-14	46	37	1.5	-9	48.25	49.25	34.5	-36.5
65	80.25	76	74.5	42	12.5	10.5	9	82	46.5	36.5	17.5	-13	59	51	0.5	-6	52.5	53	34.5	-38.5
70	91.5	77.75	81.5	46.5	18.5	13	11.5	88.5	52	38.5	18	-13	66	63.5	3	-5	55.25	56.75	36	-41
75	101	86.25	86	51	22	13	11.5	95.5	54.5	43	19	-13.5	69	70.5	7.5	-3.5	59.5	60.5	37.5	-43.5
80	108.75	93	92	53.5	23.5	15	14	98.5	59	42	19.5	-11	79	79	12	-4.5	62.5	67	38.5	-46.5
85	117	101.5	94.5	56	27	16	13	101.5	60.5	46	20	-13.5	85	86	15.5	-4.5	68.25	70.25	39.5	-49
90	123.75	107.25	98.5	60.5	28.5	17.5	15.5	120	63.5	46.5	20.5	-12	91.5	92	18	-4.5	79.25	75.75	39.5	-51
95	132	114.75	99.5	62	30	19	16	110.5	67	47	21	-11.5	98.5	96.5	21	-4	83.75	78.25	37.5	-52.5
100	136.25	119	103	65.5	30	20	15.5	110.5	70	49.5	21.5	-11.5	104.5	102	24	-4.5	94.25	82.25	36	-54.5
105	144	125.5	106	65.5	32.5	20	17	113.5	73	49	20.5	-10.5	111.5	107	25	-4.5	98.75	84.25	37	-57
110	148	129.25	108.5	68.5	33	20	17.5	116.5	71.5	50.5	22	-11	120.5	109	25	-5	105.25	87.75	35	-59
115	155.25	135.75	112.5	71	35.5	22.5	17.5	116	74	49.5	21.5	-10.5	128.5	116.5	26	-4.5	112.75	92.75	35.5	-61
120	159.25	138.75	116	72.5	36	23	20	121	78	53	22.5	-9.5	129	119	26	-5.5	119.25	97.25	32	-62
125	163.5	143.5	118.5	73.5	37	24	19.5	123	81	52	23	-9.5	134	124	29.5	-6.5	124.5	96	31	-64
130	168.75	146.25	121	75.5	37	24.5	19.5	126	82	53.5	23.5	-10.5	138.5	128.5	29.5	-6	129	100.5	31.5	-65.5
135	173.25	151	125	79	39.5	25	21	130.5	84.5	54	24.5	-9.5	139.5	129.5	28	-6.5	134.25	104.75	27.5	-66
140	178.75	155.5	130.5	81	39	26.5	22	134	86.5	55.5	24	-8.5	145.5	135.5	31.5	-9.5	136.5	107.5	26.5	-67.5
145	182.75	162.25	133	82.5	39.5	26	22	136.5	88.5	55.5	25	-8	147	137	31	-8	146.75	112.25	28	-70
150	186.5	167.5	138.5	83	41.5	26	22.5	140.5	90.5	55.5	26.5	-7	151	141	31	-8.5	146.75	114.75	22.5	-70.5
155	193.25	171.5	143.5	86.5	41.5	27	25	143.5	93	57.5	26	-7.5	152.5	142.5	30	-8.5	156	121	22	-69.5
160	197.75	177	147.5	89	44.5	29.5	25	148	94	59	27	-7	158	148	31.5	-7	160.75	123.75	22	-71
165	202.75	183.75	155	92	45	29.5	26.5	151	96.5	60	28	-6	159	149	32	-8.5	165.75	127.25	22	-72.5
170	210.75	188.75	160	92.5	46.5	30	27	154	99.5	62	28	-6.5	163	153	35	-8.5	172.25	130.75	23	-73.5
175	217.25	194.75	163.5	96.5	48	31.5	27	157	101.5	61.5	30.5	-6.5	167	157	38	-10.5	177.25	134.75	20.5	-74.5
180	222.5	198.75	171	100	49.5	33	29	160.5	104.5	63.5	30.5	-4.5	171	161	38.5	-9	186.25	140.25	20	-75
185	230.5	203.75	174	102	50.5	33.5	29	162.5	105	63	32	-3.5	171.5	161.5	41	-9.5	190	141	21	-75
190	234.25	208.5	177.5	104.5	50.5	33.5	29.5	168	107.5	66	32.5	-3	177	167	44	-9.5	193.25	144.75	20	-75.5
195	239.5	214.5	181.5	109	54.5	36	31.5	168.5	110.5	66	33	-1.5	180.5	170.5	44.5	-10	199.75	147.75	18.5	-76
200	247	217.5	187.5	110	54.5	36.5	31.5	173	111.5	65.5	33.5	-2.5	183	173	46.5	-10	203.5	151.5	16	-75.5
