# Supplementary material for: Polyphenols from traditional Chinese medicine and Mediterranean diet are effective against Aβ toxicity in vitro and in vivo in Caenorhabditis elegans
Source: Royal Society of Chemistry journal article supplement (doi:10.1039/d1fo02147h), 2021-12-15
Supplement: d1fo02147h2.pdf [file d1fo02147h2.pdf]

## Appendix 1: Supplementary Information

### **Polyphenols from Traditional Chinese Medicine and Mediterranean Diet are effective against A $\beta$ toxicity *in vitro* and *in vivo* in *Caenorhabditis elegans***

#### **Natural polyphenols reduce A $\beta$ toxicity *in vitro* and *in vivo***

Adriana Gea-González (B.S.) ‡, Samanta Hernández-García (Ph.D) ‡, Paula Henarejos-Escudero (B.S), Pedro Martínez-Rodríguez (B.S), Francisco García-Carmona (Ph.D), Fernando Gandía-Herrero (Ph.D)\*

Departamento de Bioquímica y Biología Molecular A, Unidad Docente de Biología, Facultad de Veterinaria. Regional Campus of International Excellence "Campus Mare Nostrum". Universidad de Murcia, Murcia (Spain).

‡ These authors contributed equally to this work

\*Corresponding author Fernando Gandía-Herrero Departamento de Bioquímica y Biología Molecular A, Unidad Docente de Biología, Facultad de Veterinaria. Regional Campus of International Excellence "Campus Mare Nostrum". Universidad de Murcia, Murcia (Spain). (Tel: +34 868 889592; Fax: +34 868 884147; E-mail: [fgandia@um.es](mailto:fgandia@um.es)).

## Index

|                                                                                                                                                                       |           |
|-----------------------------------------------------------------------------------------------------------------------------------------------------------------------|-----------|
| <b>Results and Discussion</b>                                                                                                                                         | <b>3</b>  |
| <b>Supplementary Fig. S1. (A) SDS-PAGE electrophoresis analysis of human A<math>\beta</math> purification process. (B) Western-blot analysis of the SDS-page gel.</b> | <b>3</b>  |
| <b>Supplementary Fig. S2. ESI/MS/Q-TOF mass spectra obtained for A<math>\beta</math> peptide after deconvolution process.</b>                                         | <b>4</b>  |
| <b>Supplementary Fig. S3. Effect of A<math>\beta</math> protein quantity on the aggregation velocity</b>                                                              | <b>5</b>  |
| <b>Supplementary Fig. S4. Fluorescence normalized curves for human A<math>\beta</math> aggregation in the presence of naturally occurring polyphenols.</b>            | <b>6</b>  |
| <b>Supplementary Fig. S5. Naturally-occurring polyphenols effect on AD model strain's lifespan.</b>                                                                   | <b>7</b>  |
| <b>Table S1. Survival data</b>                                                                                                                                        | <b>8</b>  |
| <b>Supplementary Fig. S6. Effect of polyphenols in A<math>\beta</math> aggregation <i>in vivo</i>.</b>                                                                | <b>9</b>  |
| <b>Table S2: Data obtained from the chemotaxis assays</b>                                                                                                             | <b>10</b> |

## Supplementary Methods

### Results and Discussion

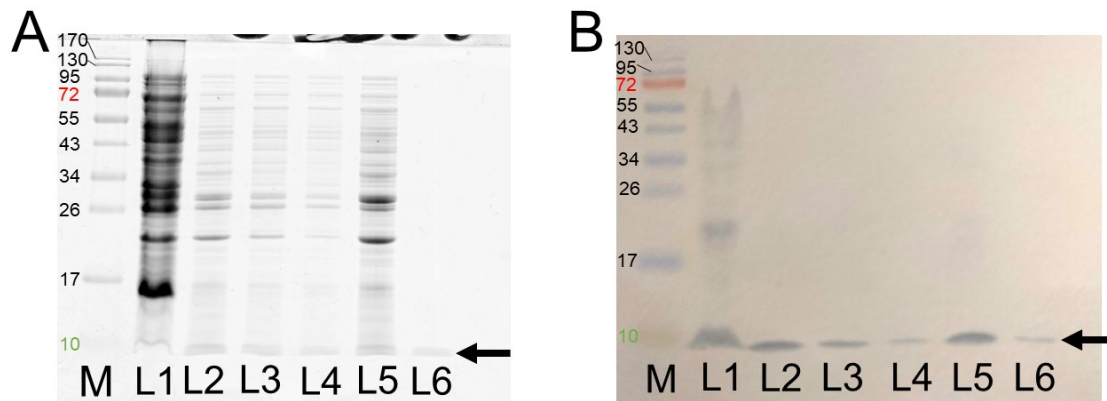

**Supplementary Fig. S1.** (A) SDS-PAGE electrophoresis analysis of human A $\beta$  purification process. M: Molecular weight marker; L1: urea-solubilized pellet after sonication; L2, L3 y L4: eluates obtained after the ion-exchange chromatography; L5: discarded concentrate after the 30 kDa mass cut-off filter; L6: Filtrated pure protein used for the aggregation assays. (B) Western-blot analysis of the SDS-page gel using a specific monoclonal antibody against human amyloid beta peptide. Lanes description is the same than in (A). Arrow indicates the band corresponding to the human A $\beta$  peptide.

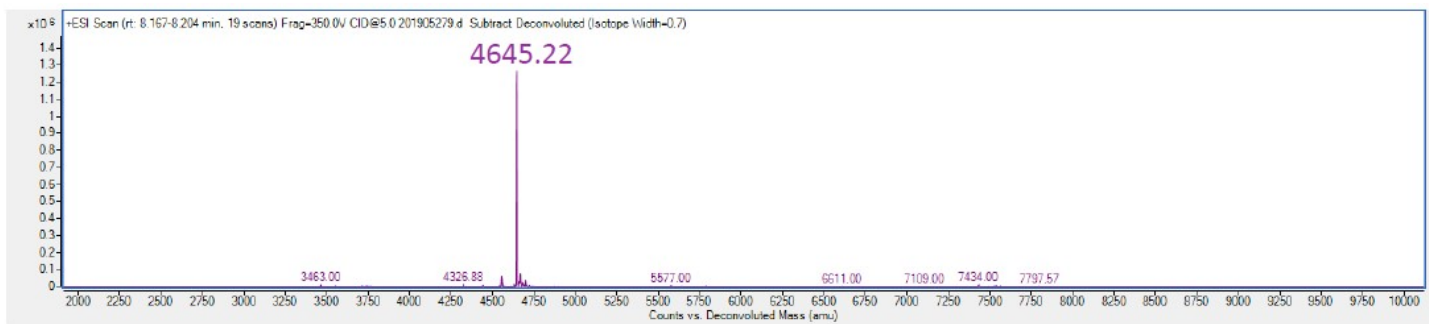

**Supplementary Fig. S2.** ESI/MS/Q-TOF mass spectra obtained for A $\beta$  peptide after deconvolution process.

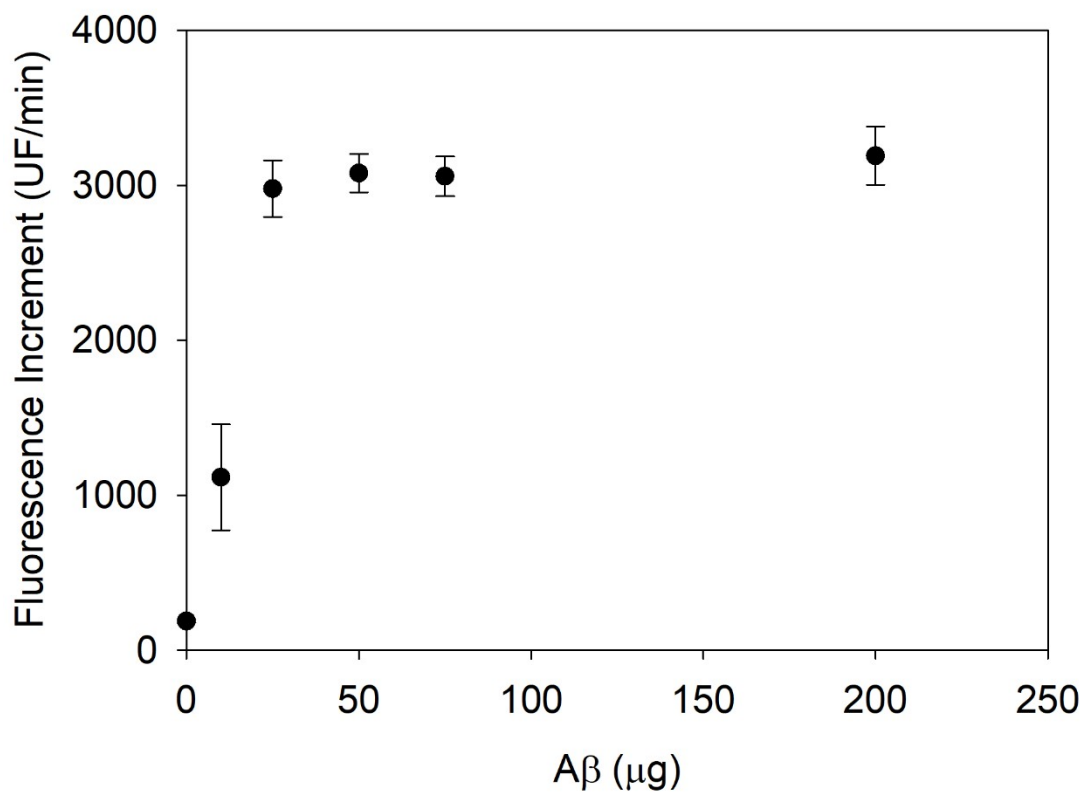

**Supplementary Fig. S3. Effect of Aβ protein quantity on the aggregation velocity.**

The data is represented as mean fluorescent increment  $\pm$  S.D, assay was performed in duplicate, two independent experiments were performed.

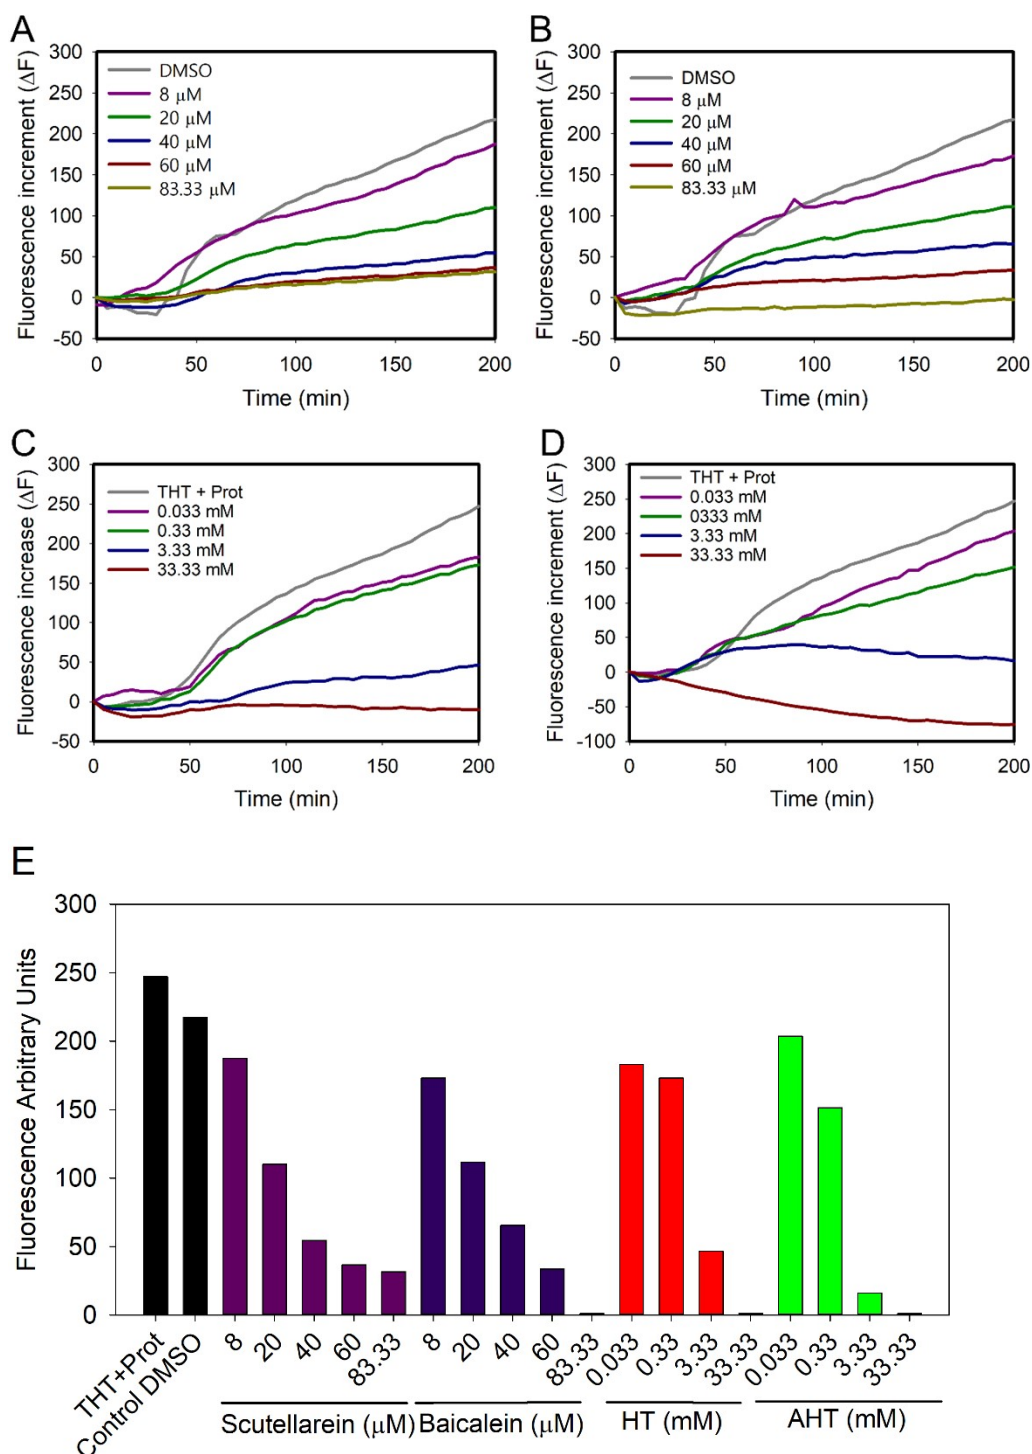

**Supplementary Fig. S4.** Fluorescence normalized curves for human A $\beta$  aggregation in the presence of naturally occurring polyphenols. (A) Scutellarein, (B) Baicalein, (C) Hydroxytyrosol, (D) Hydroxytyrosol acetate. DMSO control referred to DMSO 0.33 %, THT and protein, two replicates were prepared for each condition and two independent experiments were performed. (E) Fluorescence intensity values at 200 minutes of the assay for each condition.

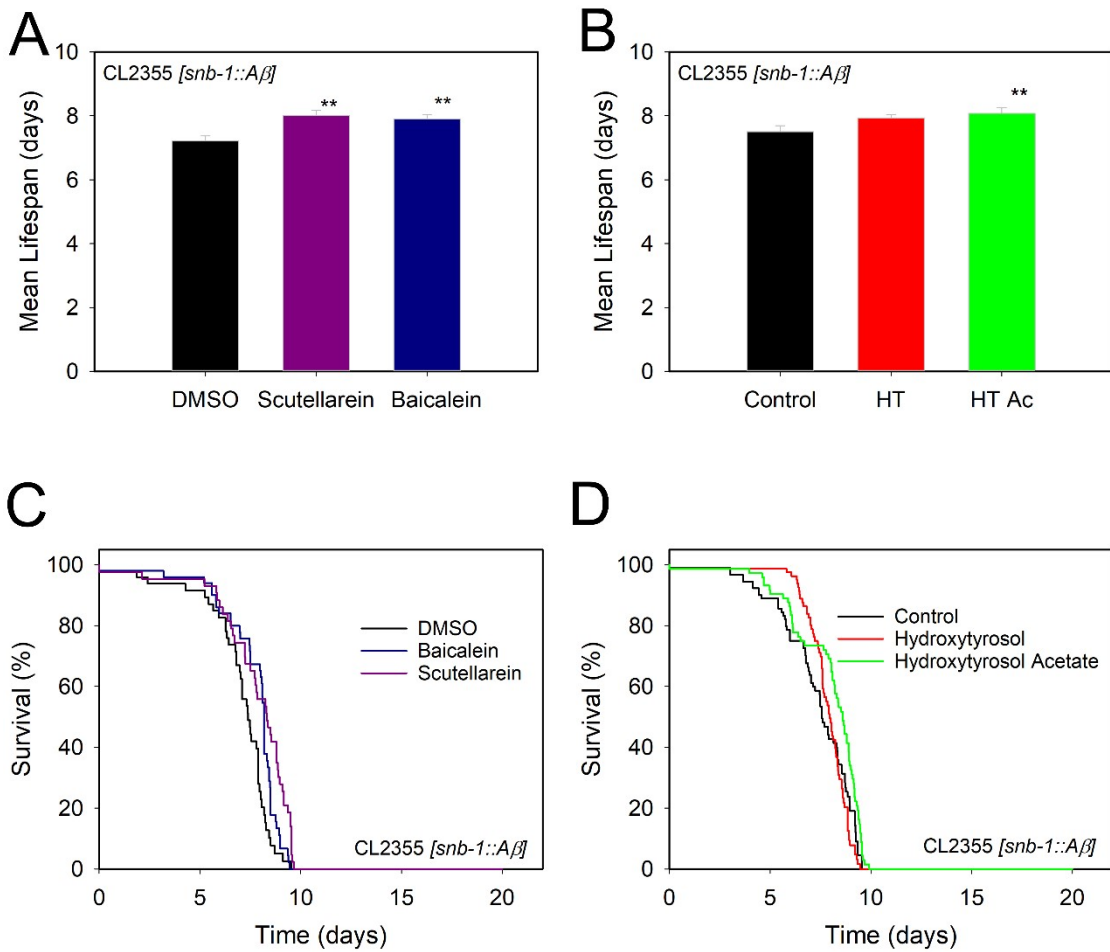

**Supplementary Fig. S5.** Naturally-occurring polyphenols effect on AD model strain's lifespan. Histograms show the mean lifespan of the strain CL2355 treated with flavones (A) and tyrosols (B). Data are represented as mean lifespan  $\pm$  standard error, three plates per condition were measured. \* significant at  $p < 0.05$ . Representative mortality curves are shown for the strain CL2355 treated with flavones (C) and tyrosols (D).

**Table S1. Survival data**

|                     | <b>n</b> | <b>Mean<br/>Lifespan<br/>(days)</b> | <b>Error<br/>Standart</b> | <b>Change</b> | <b><i>p</i> vs<br/>Control</b> |
|---------------------|----------|-------------------------------------|---------------------------|---------------|--------------------------------|
| <b>Control</b>      | 92       | 7.51                                | 0.18                      | 0.00          |                                |
| <b>HT</b>           | 81       | 7.94                                | 0.1                       | 5.73          | 0.7273                         |
| <b>HT Ac</b>        | 73       | 8.08                                | 0.18                      | 7.59          | 0.0213                         |
| <b>DMSO</b>         | 98       | 7.21                                | 0.16                      | 0.00          |                                |
| <b>Scutellarein</b> | 86       | 8.01                                | 0.17                      | 11.10         | 0.0000055                      |
| <b>Baicalein</b>    | 100      | 7.9                                 | 0.13                      | 9.57          | 0.0001                         |



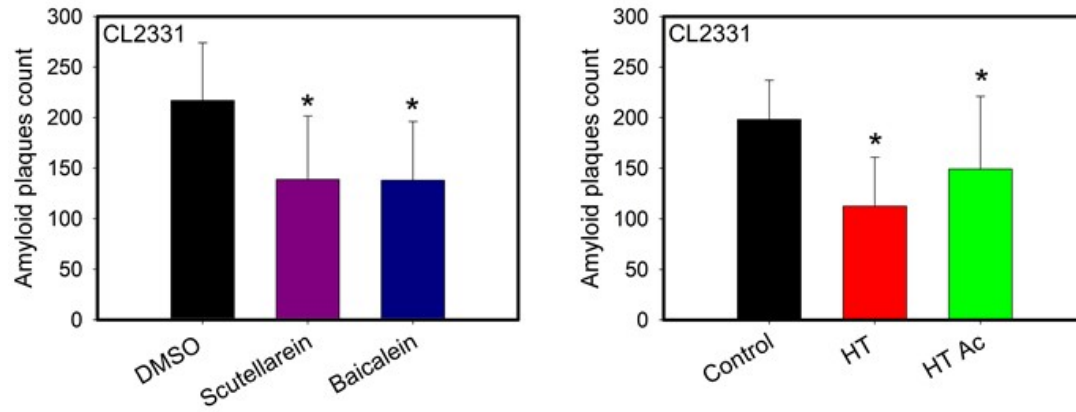

**Supplementary Fig. S6. Effect of polyphenols in A $\beta$  aggregation *in vivo*.** The results were obtained by counting the A $\beta$  aggregates generated in the muscle walls of the *C. elegans* strain CL2331. Data are shown as mean values  $\pm$  standard deviation,  $n \geq 10$ , three plates for condition and two independent trials were performed. \* significant at  $p < 0.05$  flavones vs. DMSO control, tyrosols vs. Water control.

**Table S2: Data obtained from the chemotaxis assays**

| Assay        | Treatment    | Plate | C <sup>a</sup> | T <sup>b</sup> | Total number of worms <sup>c</sup> | Worms in the center <sup>d</sup> |    |
|--------------|--------------|-------|----------------|----------------|------------------------------------|----------------------------------|----|
| 1            | DMSO         | 1     | 35             | 53             | 88                                 | 56                               |    |
|              |              | 2     | 18             | 27             | 45                                 | 49                               |    |
|              |              | 3     | 27             | 36             | 63                                 | 40                               |    |
|              |              | 4     | 31             | 29             | 50                                 | 46                               |    |
|              | Scutellarein | 1     | 14             | 22             | 36                                 | 63                               |    |
|              |              | 2     | 27             | 39             | 68                                 | 41                               |    |
|              |              | 3     | 26             | 52             | 78                                 | 39                               |    |
|              |              | 4     | 26             | 44             | 70                                 | 52                               |    |
|              | Baicalein    | 1     | 13             | 19             | 32                                 | 33                               |    |
|              |              | 2     | 16             | 27             | 43                                 | 44                               |    |
|              |              | 3     | 21             | 41             | 62                                 | 36                               |    |
|              |              | 4     | 11             | 18             | 29                                 | 30                               |    |
| 2            | Control      | 1     | 14             | 18             | 32                                 | 39                               |    |
|              |              | 2     | 10             | 12             | 22                                 | 28                               |    |
|              |              | 3     | 12             | 15             | 27                                 | 25                               |    |
|              |              | 4     | 12             | 15             | 27                                 | 38                               |    |
|              | HT           | 1     | 12             | 32             | 44                                 | 33                               |    |
|              |              | 2     | 26             | 50             | 76                                 | 34                               |    |
|              |              | 3     | 14             | 24             | 38                                 | 41                               |    |
|              |              | 4     | 8              | 13             | 21                                 | 30                               |    |
|              | HT Ac        | 1     | 8              | 14             | 22                                 | 43                               |    |
|              |              | 2     | 10             | 19             | 29                                 | 38                               |    |
|              |              | 3     | 6              | 10             | 16                                 | 31                               |    |
|              |              | 4     | 19             | 27             | 46                                 | 26                               |    |
| 3            | Control      | 1     | 18             | 24             | 42                                 | 43                               |    |
|              |              | 2     | 6              | 6              | 12                                 | 38                               |    |
|              |              | 3     | 6              | 7              | 13                                 | 31                               |    |
|              | HT           | 1     | 6              | 14             | 20                                 | 46                               |    |
|              |              | 2     | 8              | 15             | 23                                 | 40                               |    |
|              |              | 3     | 7              | 14             | 21                                 | 36                               |    |
|              | HT Ac        | 1     | 12             | 18             | 30                                 | 36                               |    |
|              |              | 2     | 16             | 16             | 32                                 | 32                               |    |
|              |              | 3     | 12             | 18             | 30                                 | 42                               |    |
|              | 4            | DMSO  | 1              | 30             | 40                                 | 70                               | 17 |
|              |              |       | 2              | 24             | 36                                 | 60                               | 32 |
|              |              |       | 3              | 25             | 34                                 | 59                               | 14 |
| Scutellarein |              | 1     | 17             | 33             | 50                                 | 20                               |    |
|              |              | 2     | 21             | 35             | 56                                 | 24                               |    |
|              |              | 3     | 19             | 40             | 59                                 | 21                               |    |
| Baicalein    |              | 1     | 17             | 32             | 49                                 | 31                               |    |
|              |              | 2     | 25             | 42             | 67                                 | 38                               |    |
|              |              | 3     | 13             | 16             | 29                                 | 48                               |    |

<sup>a</sup> number of animals in the control quadrants

<sup>b</sup> number of worms in the attractant quadrants

<sup>c</sup> total number of individuals for the chemotaxis assay (C+T)

<sup>d</sup> animals that did not leave the center of the plate, were counted but not included in the chemotaxis index.

**Appendix 2:** Fluorescence raw data for the *in vitro* amyloid aggregation assay. Data shown are averages of two independent experiments.
